# Supplementary material
Source: PubMed Central journal article supplement (PMC1941476)

| Location               |        | HSC     | MPP     | CLP     | CMP     | GMP     | MEP     | proT3   | proT4   | Thym.   |
|------------------------|--------|---------|---------|---------|---------|---------|---------|---------|---------|---------|
|                        |        | % Ratio |
| Riken23 CpG Island/PRO | -8498  | 0       | 0       | 0       | 0       | 0       | 0       | 0       | 0       | 0       |
|                        | -8467  | 0       | 0       | 0       | 0       | 0       | 0       | 0       | 0       | 0       |
|                        | -8457  | 0       | 0       | 0       | 0       | 0       | 0       | 0       | 0       | 0       |
|                        | -8453  | 0       | 0       | 0       | 0       | 0       | 0       | 0       | 0       | 0       |
|                        | -8444  | 0       | 0       | 0       | 0       | 0       | 0       | 0       | 0       | 0       |
|                        | -8442  | 0       | 0       | 0       | 0       | 0       | 0       | 0       | 0       | 0       |
|                        | -8432  | 0       | 0       | 0       | 0       | 0       | 0       | 0       | 0       | 0       |
|                        | -8423  | 0       | 0       | 0       | 0       | 0       | 0       | 0       | 0       | 0       |
|                        | -8403  | 0       | 0       | 0       | 0       | 0       | 0       | 0       | 0       | 90      |
|                        | -8401  | 0       | 0       | 0       | 0       | 0       | 0       | 0       | 0       | 0       |
|                        | -8386  | 0       | 0       | 0       | 0       | 0       | 0       | 0       | 0       | 0       |
|                        | -8350  | 0       | 0       | 0       | 0       | 0       | 0       | 0       | 0       | 0       |
|                        | -8346  | 0       | 0       | 0       | 0       | 0       | 0       | 0       | 0       | 0       |
| Pcra ENH               | -4362  | 98      | 98      | 98      | 98      | 98      | 98      | 17      | 31      | 0       |
|                        | -4318  | 50      | 75      | 75      | 75      | 58      | 67      | 33      | 23      | 0       |
|                        | -4292  | 58      | 67      | 67      | 50      | 67      | 67      | 25      | 31      | 0       |
|                        | -4220  | 25      | 42      | 33      | 25      | 58      | 58      | 17      | 23      | 0       |
|                        | -4130  | 25      | 50      | 36      | 25      | 58      | 17      | 0       | 15      | 0       |
|                        | -4080  | 0       | 0       | 0       | 0       | 0       | 0       | 0       | 0       | 0       |
|                        | -4042  | 50      | 42      | 73      | 67      | 50      | 33      | 0       | 0       | 0       |
|                        | -3997  | 42      | 17      | 42      | 0       | 0       | 17      | 0       | 0       | 0       |
|                        | -3965  | 98      | 98      | 98      | 98      | 98      | 98      | 0       | 0       | 0       |
|                        | -3947  | 42      | 58      | 67      | 67      | 6       | 67      | 0       | 0       | 0       |
|                        | -3900  | 25      | 75      | 98      | 58      | 0       | 75      | 13      | 0       | 0       |
|                        | -3818  | 25      | 42      | 6       | 36      | 0       | 58      | 0       | 0       | 0       |
|                        | -3806  | 98      | 98      | 98      | 98      | 25      | 98      | 36      | 25      | 17      |
| -3800                  | 75     | 58      | 67      | 55      | 17      | 67      | 13      | 13      | 0       |         |
| -3722                  | 60     | 60      | 98      | 98      | 50      | 60      | 13      | 13      | 14      |         |
| -3693                  | 98     | 98      | 98      | 98      | 70      | 98      | 38      | 13      | 23      |         |
| Pcra PRO               | +111   | 60      | 60      | 50      | 71      | 66      | 66      | 0       | 0       | 0       |
|                        | +152   | 60      | 60      | 98      | 98      | 98      | 98      | 0       | 0       | 0       |
| Trnc5 CpG Island/PRO   | +11454 | 0       | 0       | 0       | 0       | 0       | 0       | 0       | 0       | 0       |
|                        | +11457 | 0       | 0       | 0       | 0       | 0       | 0       | 0       | 0       | 0       |
|                        | +11461 | 0       | 0       | 0       | 0       | 0       | 0       | 0       | 0       | 0       |
|                        | +11463 | 0       | 0       | 0       | 0       | 0       | 0       | 0       | 0       | 0       |
|                        | +11474 | 0       | 0       | 0       | 0       | 0       | 0       | 0       | 0       | 0       |
|                        | +11480 | 0       | 0       | 0       | 0       | 0       | 0       | 0       | 0       | 0       |
|                        | +11487 | 0       | 0       | 0       | 0       | 0       | 0       | 0       | 0       | 0       |
|                        | +11500 | 0       | 0       | 0       | 0       | 0       | 0       | 0       | 0       | 0       |
|                        | +11504 | 0       | 0       | 0       | 0       | 0       | 0       | 0       | 0       | 0       |
|                        | +11511 | 0       | 0       | 0       | 0       | 0       | 0       | 0       | 0       | 0       |
|                        | +11516 | 0       | 0       | 0       | 0       | 0       | 0       | 0       | 0       | 0       |
|                        | +11523 | 0       | 0       | 0       | 0       | 0       | 0       | 0       | 0       | 0       |
|                        | +11528 | 0       | 0       | 0       | 0       | 0       | 0       | 0       | 0       | 0       |
|                        | +11532 | 0       | 0       | 0       | 0       | 0       | 0       | 0       | 0       | 0       |
|                        | +11550 | 0       | 0       | 0       | 0       | 0       | 0       | 0       | 0       | 0       |
|                        | +11554 | 0       | 0       | 0       | 0       | 0       | 0       | 0       | 0       | 0       |
|                        | +11562 | 0       | 0       | 0       | 0       | 0       | 0       | 0       | 0       | 0       |
|                        | +11568 | 0       | 0       | 0       | 0       | 0       | 0       | 0       | 0       | 0       |
|                        | +11572 | 0       | 0       | 0       | 0       | 0       | 0       | 0       | 0       | 0       |
|                        | +11567 | 0       | 0       | 0       | 0       | 0       | 0       | 0       | 0       | 0       |
| +11589                 | 0      | 0       | 0       | 0       | 0       | 0       | 0       | 0       | 0       |         |
| +11591                 | 0      | 0       | 0       | 0       | 0       | 0       | 0       | 0       | 0       |         |
| +11593                 | 0      | 0       | 0       | 0       | 0       | 0       | 0       | 0       | 0       |         |
| +11599                 | 0      | 0       | 0       | 0       | 0       | 0       | 0       | 0       | 0       |         |
| +11608                 | 0      | 0       | 0       | 0       | 0       | 0       | 0       | 0       | 0       |         |
| +11611                 | 0      | 0       | 0       | 0       | 0       | 0       | 0       | 0       | 0       |         |
| +11614                 | 0      | 0       | 0       | 0       | 0       | 0       | 0       | 0       | 0       |         |

% of Methylated CpG

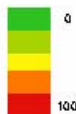

Supplement: pnas_0704468104_4.pdf [file pnas_0704468104_4.pdf]
