# Supplementary material
Source: PubMed Central journal article supplement (PMC1941476)

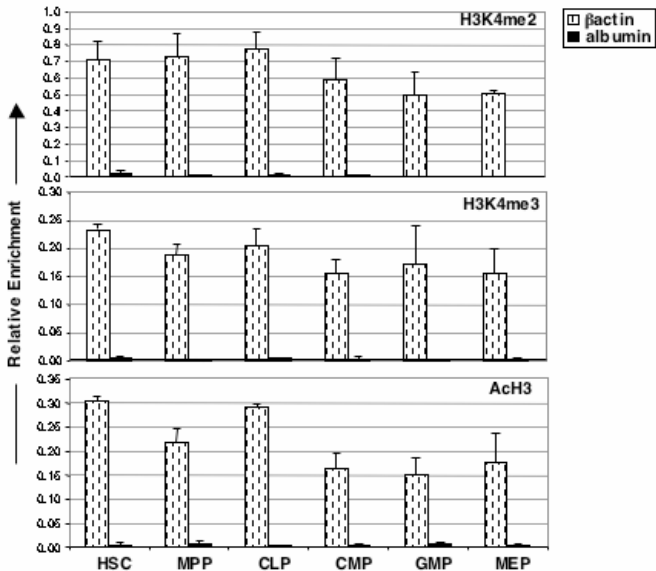

Supplement: pnas_0704468104_2.pdf [file pnas_0704468104_2.pdf]

| Location           |        | HSC |       | MPP |       | CLP |       | CMP |       | GMP |       | MEP |       | Liver |       |
|--------------------|--------|-----|-------|-----|-------|-----|-------|-----|-------|-----|-------|-----|-------|-------|-------|
|                    |        | %   | Ratio | %     | Ratio |
| <i>Albumin</i> ENH | -10845 | 92  | 11/12 | 100 | 12/12 | 100 | 11/11 | 91  | 10/11 | 82  | 9/11  | 100 | 12/12 | 18    | 2/11  |
|                    | -10787 | 100 | 12/12 | 100 | 12/12 | 100 | 11/11 | 91  | 10/11 | 100 | 11/11 | 100 | 12/12 | 27    | 3/11  |
|                    | -10699 | 100 | 12/12 | 100 | 12/12 | 82  | 9/11  | 100 | 11/11 | 100 | 10/10 | 100 | 12/12 | 27    | 3/11  |
|                    | -10695 | 92  | 11/12 | 100 | 12/12 | 91  | 10/11 | 81  | 9/11  | 100 | 10/10 | 83  | 10/12 | 27    | 3/11  |
|                    | -10592 | 83  | 10/12 | 100 | 9/9   | 100 | 10/10 | 100 | 11/11 | 100 | 10/10 | 100 | 12/12 | 27    | 3/11  |

% of Methylated CpG

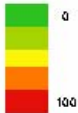

Supplement: pnas_0704468104_3.pdf [file pnas_0704468104_3.pdf]

| Location  |     | HSC |       | MPP |       | CLP |       | CMP |       | GMP |       | MEP |       | Liver |       |
|-----------|-----|-----|-------|-----|-------|-----|-------|-----|-------|-----|-------|-----|-------|-------|-------|
|           |     | %   | Ratio | %     | Ratio |
| Gata3 PRO | -88 | 0   | 0/7   | 0   | 0/6   | 0   | 0/6   | 0   | 0/6   | 0   | 0/6   | 0   | 0/6   | 0     | 0/5   |
|           | -70 | 0   | 0/7   | 0   | 0/6   | 0   | 0/6   | 0   | 0/6   | 0   | 0/6   | 0   | 0/6   | 0     | 0/5   |
|           | -52 | 0   | 0/7   | 0   | 0/6   | 0   | 0/6   | 0   | 0/6   | 0   | 0/6   | 0   | 0/6   | 0     | 0/4   |
|           | -49 | 0   | 0/7   | 0   | 0/6   | 0   | 0/6   | 0   | 0/6   | 0   | 0/6   | 0   | 0/6   | 0     | 0/4   |
|           | -47 | 0   | 0/7   | 0   | 0/6   | 0   | 0/6   | 0   | 0/6   | 0   | 0/6   | 0   | 0/6   | 0     | 0/5   |
|           | -19 | 0   | 0/7   | 0   | 0/6   | 0   | 0/6   | 0   | 0/6   | 0   | 0/6   | 0   | 0/6   | 0     | 0/4   |
|           | -16 | 0   | 0/7   | 0   | 0/6   | 0   | 0/6   | 0   | 0/6   | 0   | 0/6   | 0   | 0/6   | 0     | 0/4   |
|           | -14 | 0   | 0/7   | 0   | 0/6   | 0   | 0/6   | 0   | 0/6   | 0   | 0/6   | 0   | 0/6   | 0     | 0/4   |
|           | +3  | 0   | 0/7   | 0   | 0/6   | 0   | 0/6   | 0   | 0/6   | 0   | 0/6   | 0   | 0/6   | 0     | 0/4   |
|           | +22 | 0   | 0/7   | 0   | 0/6   | 0   | 0/6   | 0   | 0/6   | 0   | 0/6   | 0   | 0/6   | 0     | 0/4   |
|           | +25 | 0   | 0/7   | 0   | 0/6   | 0   | 0/6   | 0   | 0/6   | 0   | 0/6   | 0   | 0/6   | 0     | 0/4   |

% of Methylated CpG

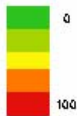

Supplement: pnas_0704468104_5.pdf [file pnas_0704468104_5.pdf]
